# Supplementary material
Source: publisher site journal article supplement (https://www.spandidos-publications.com/4972/downloadSupplementary)

**A** *F5 v/s WT*

| Group      | Median survival (days) | Number/group |
|------------|------------------------|--------------|
| F5 variant | 174.5                  | 6            |
| F5 Wt      | 414.5                  | 140          |

p=0.0078, HR=2.96

**B** *BRCA2 v/s WT*

| Group         | Median survival (days) | Number/group |
|---------------|------------------------|--------------|
| BRCA2 variant | 122.5                  | 2            |
| BRCA2 Wt      | 414.5                  | 144          |

p=0.0119, HR=5.2

**C**

Genes: XRCC3, TP53, BRCA1, BRCA2

| Group  | Median survival (days) | Number/group |
|--------|------------------------|--------------|
| Mutant | 176                    | 7            |
| Wt     | 413                    | 139          |

p=0.0229, HR=2.37

**D**

Genes: SETD8, PRSS1, ARID1B, F5, MTHFR, CDC27

| Group  | Median survival (days) | Number/group |
|--------|------------------------|--------------|
| Mutant | 176                    | 9            |
| Wt     | 426                    | 137          |

p=0.0009, HR=3.06

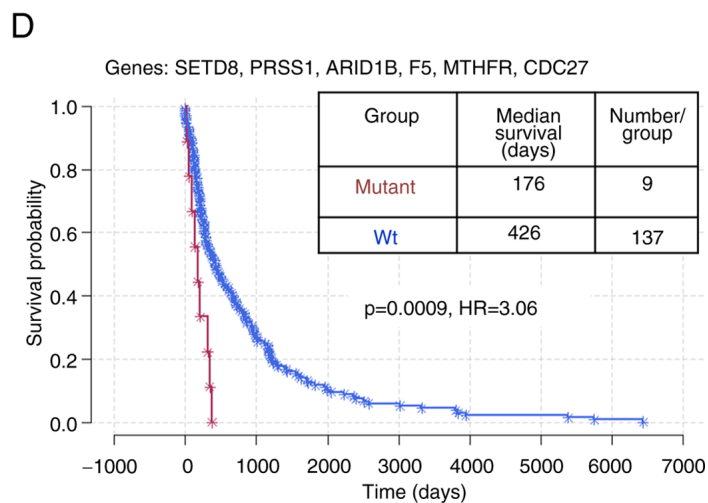

Supplement: Supplementary file 1 [file downloadSupplementary]
